# Supplementary material for: Abiotic reduction of p-chloronitrobenzene by sulfate green rust: influence factors, products and mechanism
Source: Royal Society of Chemistry journal article supplement (doi:10.1039/d0ra02113j), 2020-01-01
Supplement: d0ra02113j1.pdf [file d0ra02113j1.pdf]

## Supplementary Information

# **Abiotic reduction of *p*-chloronitrobenzene by sulfate green rust: Influence factors, products and mechanism**

*Ying Han, Junkai Huang, Hongyuan Liu\*, Yue Wu, Zhao Wu, Kemin Zhang and Qingjie Lu.*

College of Civil Engineering and Architecture, Zhejiang University of Technology, Hangzhou 310023,  
China

Corresponding author E-mail: lhyzyy@zjut.edu.cn

Corresponding author Tel: 86-571-85290520

Pages:5; Text:1 Figures:4; Tables:3; Equation:1

## Text S1

**GC-MS analytical method of *p*-chlorophenylhydroxylamine** The temperature program was as follows: the initial temperature was 40 °C (held for 1 min), after which it was increased to 120 °C at a rate of 5 °C min<sup>-1</sup>, and then to 120 °C at a rate of 10 °C min<sup>-1</sup>, and finally to 280 °C at a rate of 30 °C min<sup>-1</sup> (held for 2 min). The injection temperature was 250 °C, and the interface temperature was 280 °C. The injection port was operated in the splitless mode. The flow rate of the carrier gas (helium, 99.999%) was 1.0 mL min<sup>-1</sup>. The mass spectrometer was operated in electron impact (EI) and selective ion monitoring (SIM) modes with a source temperature of 230 °C, and a solvent delay of 4.5 min.

**GC-MS analytical method of *p*-nitrosochlorobenzene** The temperature program was as follows: the initial temperature was 50 °C (held for 2 min), after which it was increased to 150 °C at a rate of 10 °C min<sup>-1</sup> (held for 1 min), and finally to 270 °C at a rate of 20 °C min<sup>-1</sup> (held for 5 min). The injection temperature was 250 °C, and the interface temperature was 280 °C. The injection port was operated in the splitless mode. The flow rate of the carrier gas (helium, 99.999%) was 1.0 mL min<sup>-1</sup>. The mass spectrometer was operated in electron impact (EI) and selective ion monitoring (SIM) modes with a source temperature of 230 °C, and a solvent delay of 4.5 min.

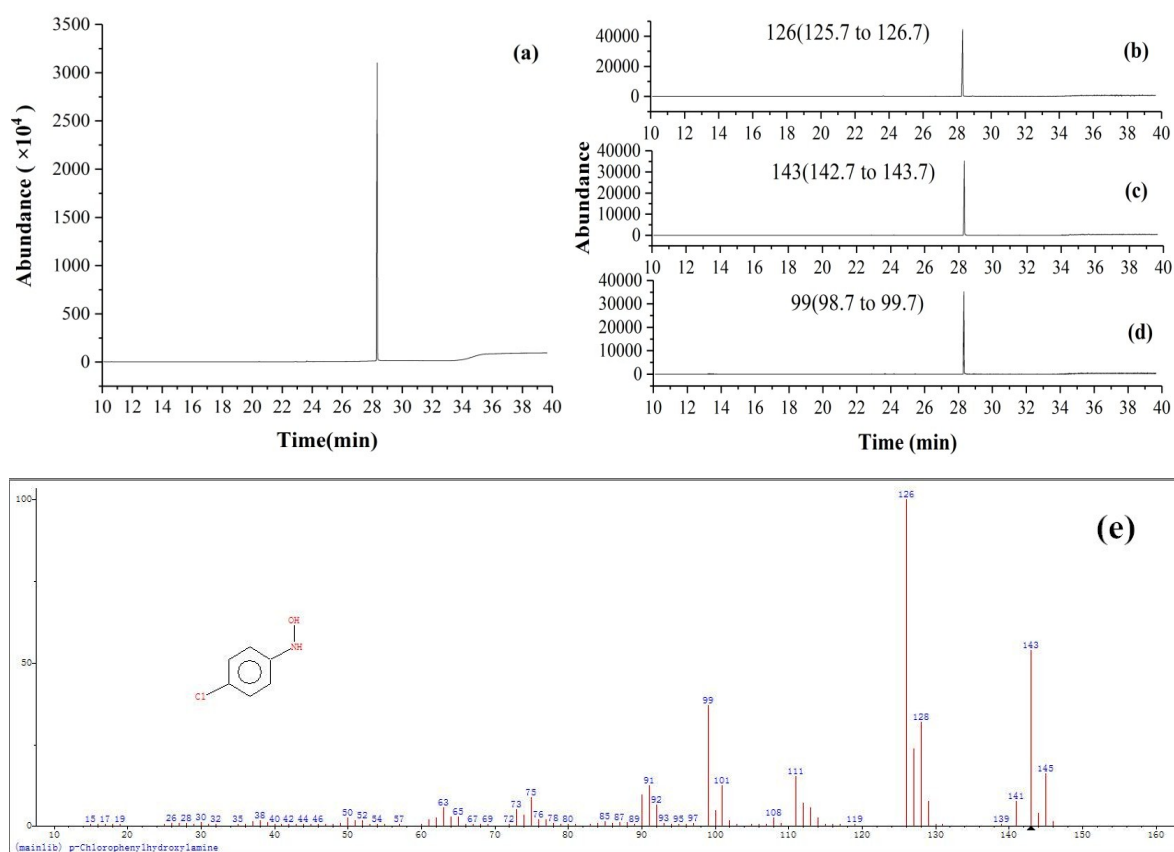

Fig. S1 GC-MS chromatogram of *p*-chlorophenylhydroxylamine (a) Total ion (b)  $m/z=126$  (c)  $m/z=143$  (d)  $m/z=99$  (e) Mass spectrum and corresponding substance

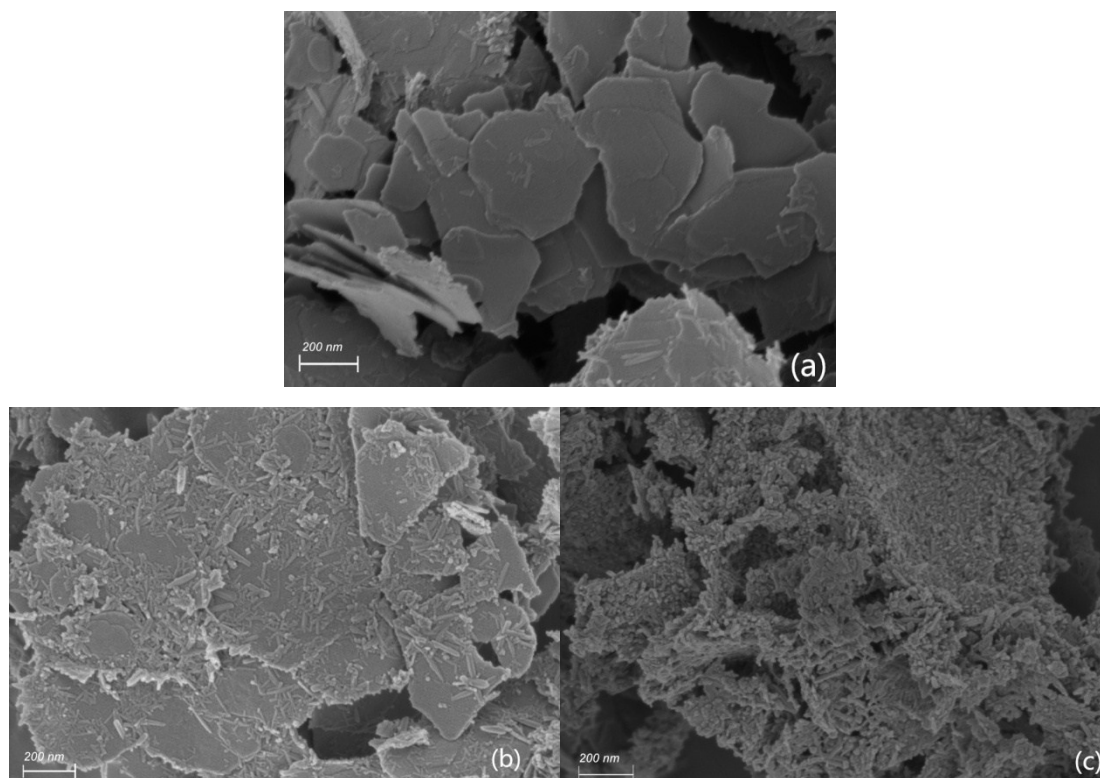

Fig.S2 SEM image of powders at (a) 0 min, (b) 15 min and (c) 40 min.

Table S1 Quantification Report of unreacted GR<sub>SO4</sub> powders

| Peak    | Position BE (eV) | FWHM (eV) | Raw Area (cps<br>eV) | RSF   | Mass Conc (%) |
|---------|------------------|-----------|----------------------|-------|---------------|
| Fe (2p) | 710.9            | 4.242     | 144505.4             | 2.957 | 54.32         |
| O(1s)   | 531.4            | 2.586     | 94278.9              | 0.780 | 36.10         |
| C (1s)  | 284.8            | 2.039     | 8130.7               | 0.278 | 6.04          |
| S (2p)  | 168.6            | 1.995     | 4895.9               | 0.668 | 3.09          |

Equation S1:

$$\text{Iron to Oxygen ratio} = \frac{\text{Raw Area}_{\text{Fe}(2p)} / \text{RSF}_{\text{Fe}(2p)}}{\text{Raw Area}_{\text{O}(1s)} / \text{RSF}_{\text{O}(1s)}} \quad (\text{S1})$$

Table S2 Gupta and Sen multiplet peaks parameters used to fit  $\text{Fe}(2p_{3/2})$  spectra of  $\text{GR}_{\text{SO}_4}$  with variable composition

| Reaction time | Species | $\text{Fe}(2p)$ (FWHM) (eV) | Area (%) |
|---------------|---------|-----------------------------|----------|
| 0 min         | Fe(II)  | 709.0 (1.4)                 | 7.5      |
|               |         | 710.2 (1.4)                 | 28.2     |
|               |         | 711.4 (1.4)                 | 17.5     |
|               | Fe(III) | 710.9 (1.7)                 | 15.3     |
|               |         | 712.4 (1.7)                 | 7.4      |
|               |         | 713.0 (1.7)                 | 15.8     |
| 15 min        | Fe(II)  | 714.0 (1.7)                 | 8.3      |
|               |         | 709.5 (1.4)                 | 14.0     |
|               |         | 710.5 (1.4)                 | 5.2      |
|               | Fe(III) | 711.4 (1.4)                 | 7.2      |
|               |         | 710.3 (1.7)                 | 11.5     |
|               |         | 711.3 (1.7)                 | 17.2     |
| 40 min        | Fe(III) | 712.4 (1.7)                 | 22.5     |
|               |         | 713.5 (1.7)                 | 22.1     |
|               |         | 710.4 (1.6)                 | 17.5     |
|               |         | 711.2 (1.6)                 | 36.5     |
|               |         | 712.3 (1.6)                 | 25.6     |
|               |         | 713.6 (1.6)                 | 20.4     |

Table S3 Binding energy values, FWHM (full-width at half-maximum), peak areas and interpretation for O(1s) spectra of

GR<sub>SO4</sub> with variable composition

| Reaction time | O(1s) (FWHM) (eV) | Area(%) | Species          |
|---------------|-------------------|---------|------------------|
| 0 min         | 529.9 (1.1)       | 15      | Fe-O             |
|               | 531.3 (1.2)       | 72      | OH <sup>-</sup>  |
|               | 532.1 (1.3)       | 13      | H <sub>2</sub> O |
| 15 min        | 530.5 (1.2)       | 21      | Fe-O             |
|               | 531.8 (1.3)       | 68      | OH <sup>-</sup>  |
|               | 532.7 (1.2)       | 11      | H <sub>2</sub> O |
| 40 min        | 530.0 (1.2)       | 31      | Fe-O             |
|               | 531.5 (1.3)       | 62      | OH <sup>-</sup>  |
|               | 532.4 (1.2)       | 7       | H <sub>2</sub> O |

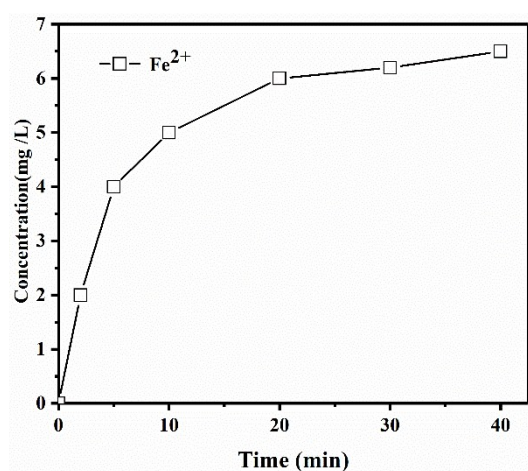

Fig. S3 Dissolved ferrous ions during the reaction.  $[p\text{-CNB}]_0 = 500 \mu\text{g/L}$ ,  $[\text{GR}_{\text{SO4}}]_0 = 0.1 \text{ g/L}$ ,  $T = 20 \text{ }^\circ\text{C}$ ,  $\text{pH} = 6.5$ .

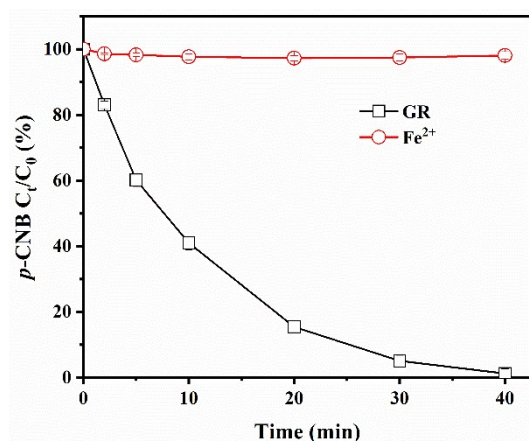

Fig. S4 Comparison of removals of *p*-CNB with Fe(II) and GR<sub>SO4</sub>. [*p*-CNB]<sub>0</sub> = 500 µg/L, [Fe(II)]<sub>0</sub> = 0.1 g/L, [GR<sub>SO4</sub>]<sub>0</sub> = 0.1 g/L, T = 20 °C, pH = 6.5. Error bars represent one standard deviation (n = 3).
